# Supplementary material
Source: PubMed Central journal article supplement (PMC9631334)
Supplement: NIHMS1846170-supplement-2.pdf [file NIHMS1846170-supplement-2.pdf]

## ■ ASSOCIATED CONTENT

### 📎 Supporting Information

The Supporting Information is available free of charge at <https://pubs.acs.org/doi/10.1021/acs.analchem.2c01274>.

MS/MS spectra, LC-MS traces, lipid structures, tables of fragment ion assignments and identified lipids, and extensive experimental details. (PDF)
